# Supplementary material
Source: PubMed Central journal article supplement (PMC3166963)

# Supplemental Figure 1

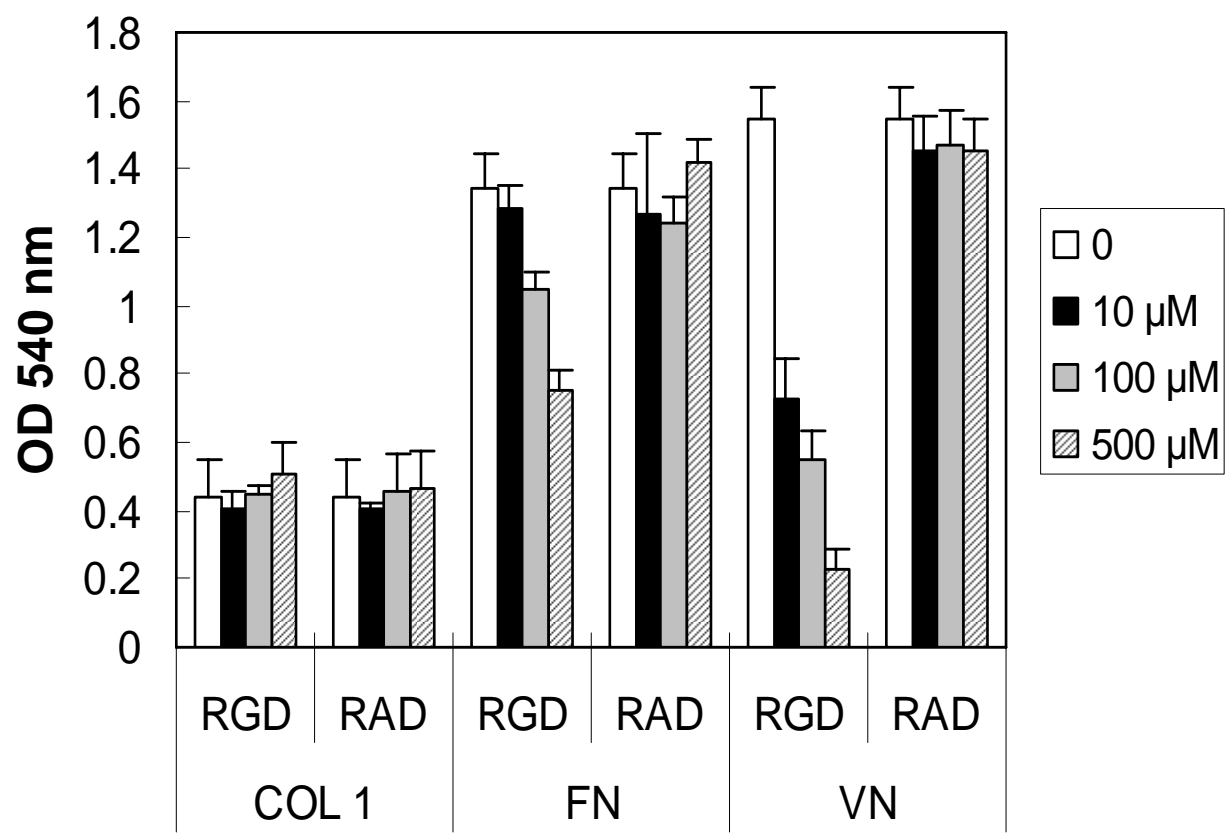

# Supplemental Figure 2

(a)

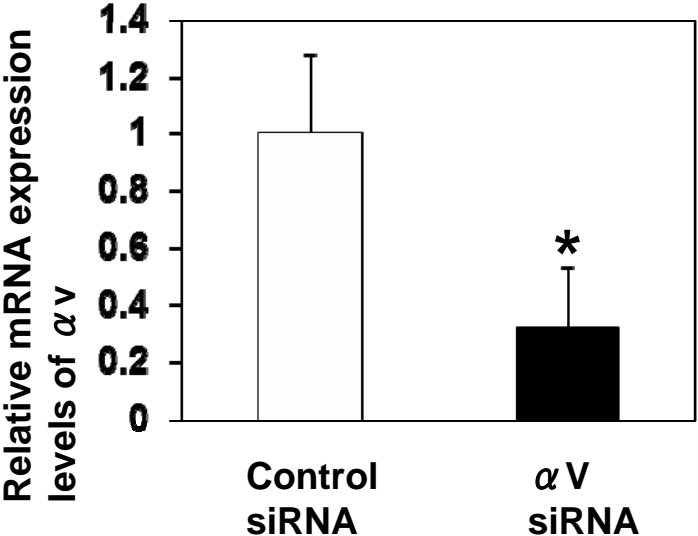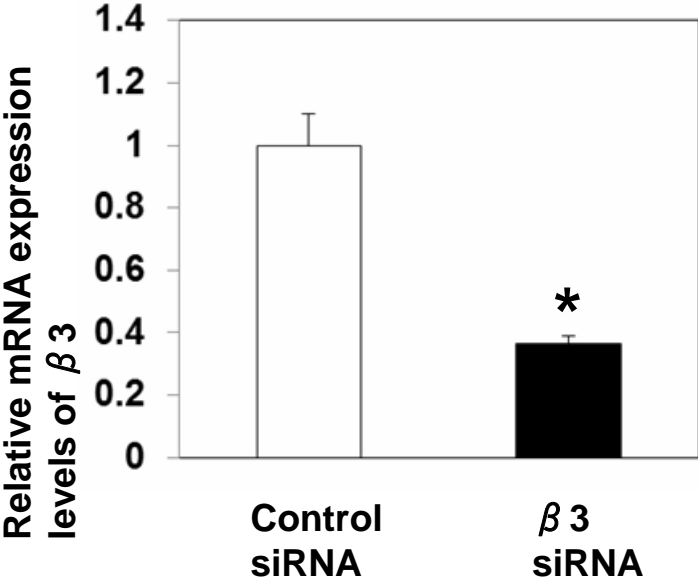

(b)

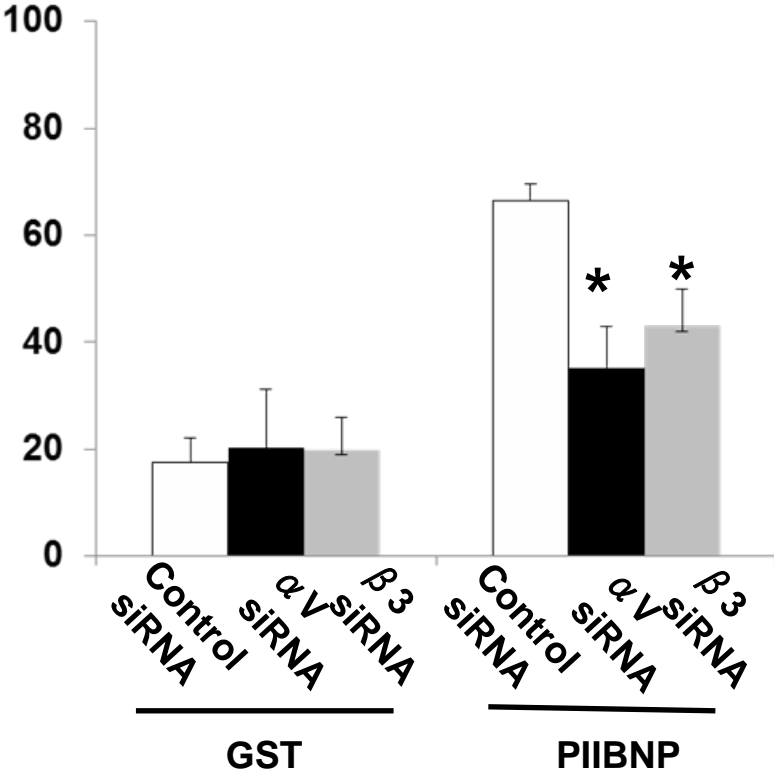

# Supplemental Figure 3

## (a) RT-PCR

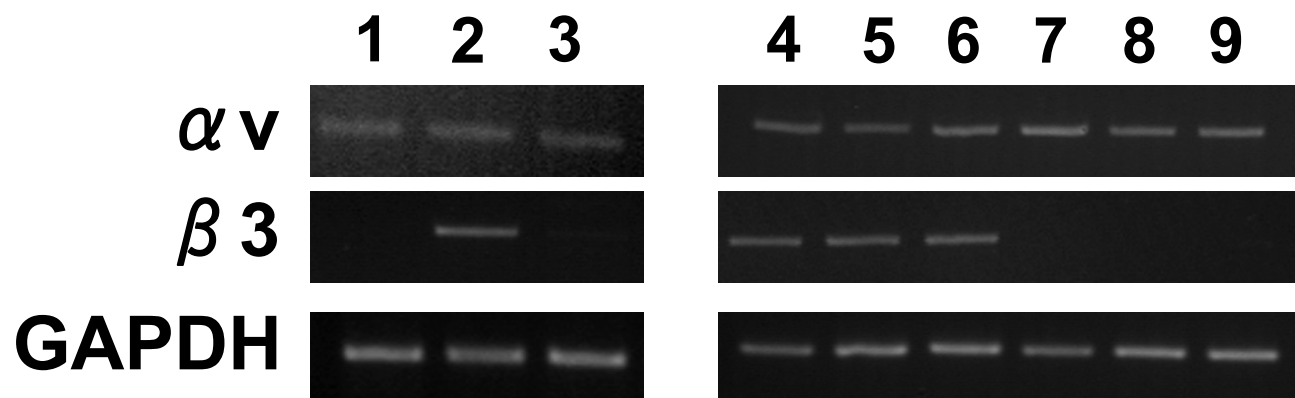

## (b) Western blotting

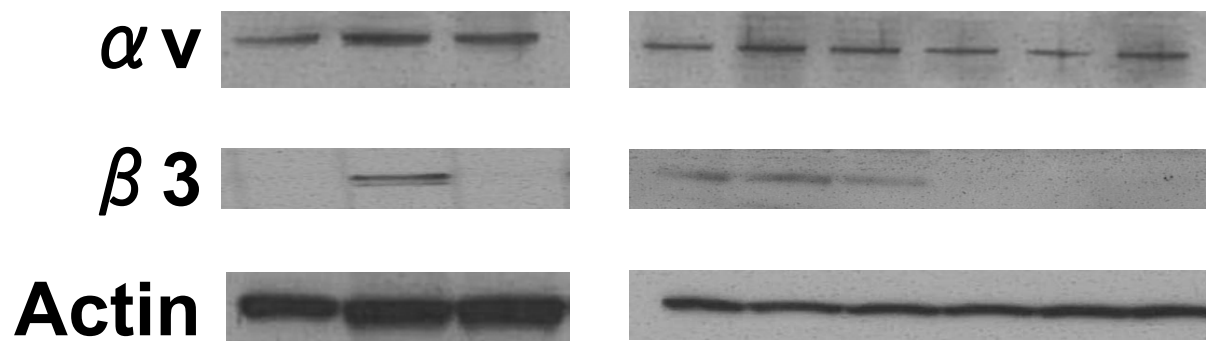

Supplement: NIHMS306693-supplement-01.pdf [file NIHMS306693-supplement-01.pdf]
